1     **Association of Arg389Gly  $\beta$ 1-adrenergic receptor polymorphism with effective**  
2     **dose of  $\beta$  blocker in congestive heart failure among Chinese Han population**

3

4

5     **Department of Cardiology, Nanjing Drum Tower Hospital, Affiliated Hospital of**  
6     **Nanjing University Medical School, Nanjing, China**

7

8     **Running title**

9      $\beta$ 1-adrenergic receptor polymorphism and heart failure

10

11    **Authors**

12    Rong Gu\*, Yu Shen\*, Jianhua Liu\*, Shuaihua Qiao\*, Lian Wang\*, Biao Xu\*

13

14    **Author Affiliation**

15    \*Department of Cardiology, Affiliated Drum Tower Hospital, Nanjing University  
16    Medical School, Nanjing, China

17

18    **Corresponding authors at**

19    Department of Cardiology, Affiliated Drum Tower Hospital, Nanjing University  
20    Medical School, Zhongshan Road, Nanjing 210008, China. Tel./fax: +86 25  
21    68182812.

22

23    **Author contributions**

24    Rong Gu and Yu Shen contributed this work equally. Lian Wang and Biao Xu are  
25    co-corresponding authors. Rong Gu, Yu Shen, Lian Wang and Biao Xu conceived and  
26    organized the project and wrote the manuscript. Jianhua Liu and Shuaihui Qiao  
27    contributed to experiments and data analysis. All authors discussed the results and  
28    commented on the manuscript.

29

30

31

32

33

34

35

36

1 **Abstract**

2 **Background:** To investigate the relationship between  $\beta$ 1-adrenergic receptor  
3 (ADRB1) gene polymorphisms and the response to medication in patients with  
4 congestive heart failure (CHF). **Methods and Results:** Two hundred and sixty  
5 patients with CHF were enrolled. Ser49Gly and Arg389Gly polymorphisms were  
6 identified. During one-year follow-up, differences of echocardiographic parameters  
7 and major adverse cardiac events (MACE) were analyzed. For Ser49Gly  
8 polymorphisms, there were no differences between AA genotype and AG/GG  
9 genotype of baseline clinical features and echocardiographic parameters as well as  
10 one-year incidence of MACE. For Arg389Gly polymorphisms, there were no  
11 significant differences in baseline clinical characteristics, LVDD and LVEF among the  
12 three genotypes. However, the increase amplitude of LVEF after one year among  
13 patients carrying GG genotype was significantly higher than those carrying CC  
14 genotype (11.7% vs 1.3%,  $P<0.05$ ). The incidence of MACE among different  
15 genotypes of CC, CG and GG were 22.2%, 10.0% and 8.3%, with statistical difference  
16 ( $P=0.021$ ). **Conclusions:** The study suggested there was no relationship between  
17 Ser49Gly polymorphisms of the ADRB1 gene and the therapeutic effect and  
18 prognosis in CHF patients under the same dosage of drugs. However, the  
19 improvement of cardiac function and prognosis in patients carrying the Gly389 allele  
20 were significantly better than those of Arg389Arg homozygous.

21 **Key words:** Congestive heart failure;  $\beta$ 1-adrenergic receptor; Gene  
22 polymorphisms; Prognosis

23

24

25

26

27

28

29

30

## 1 **1. Introduction**

2 Congestive heart failure (CHF) is a complex clinical syndrome recognized as the  
3 end-stage of various cardiovascular diseases. Intensive researches have stated the  
4 excessive long-term hyperactivation of the adrenergic nervous system in CHF  
5 contributes to disease progression (1). Blockade of  $\beta$ 1-adrenergic receptor (ADRB1),  
6 the principal subtype of adrenergic receptor on cardiomyocytes, can improve CHF  
7 patients' prognosis.

8 However, pharmaceutical effects of ADRB1 blockers vary in CHF patients,  
9 which might be explained, at least in part, by genetic differences. The coding block of  
10 intron-less ADRB1 gene has two common nonsynonymous single nucleotide  
11 polymorphisms (SNPs) at nucleotides 145 and 1165(2). Gene  
12 polymorphism(rs1801252) locus at nucleic acid 145(A→G) resulted in substitution of  
13 Ser for Gly at position 49, and subsequently lead to a lower baseline activity of  
14 adenylate cyclase and activation by isoprenaline(3). Arg389Gly gene polymorphism  
15 (rs1801253) locus at position 1165, base G is replaced by C. Arg389 variant  
16 predisposes to heart failure by instigating hyperactive signaling programs leading to  
17 depressed receptor coupling and ventricular dysfunction(4).

18 However, so far, the results of different researches in this field were inconsistent,  
19 even paradoxical, so there is no definite conclusion to guide clinical applications(5,6).  
20 Also, few researches were performed among Chinese people.

21 Our study aimed to explore the relationship of ADRB1 gene polymorphism of  
22 Ser49Gly and Arg389Gly and their corresponding therapeutic response.

## 23 **2. Materials and Methods**

### 24 **2.1. Study population**

25 We examined 260 adult patients with CHF, who were referred to Cardiology  
26 Department, Nanjing Drum Tower Hospital between October 2013 and April 2015.  
27 Inclusion criteria: age between 18 and 80 years; etiology of CHF is either idiopathic  
28 dilated cardiomyopathy (IDCM) or ischemic heart disease (IHD) which was  
29 diagnosed by coronary angiography; left ventricular ejection fraction (LVEF)  $\leq$ 40% in  
30 echocardiography; New York Heart Association (NYHA) Classification Cardiac

1 Function II-III under proper treatment. Exclusion criteria: acute myocardial infarction;  
2 second or third degree atrioventricular block, sick sinus syndrome, cardiac arrest,  
3 allergy to  $\beta$  receptor blocker, asthma, severe kidney or liver dysfunction, malignant  
4 tumor, life expectancy <1 year and cardiac resynchronization therapy with pacemaker  
5 function (CRT-P) or cardiac resynchronization therapy with defibrillator  
6 function (CRT-D) implantation within 1 year.

## 7 **2.2. Automated DNA sequence analysis**

8 Genomic DNA was extracted from peripheral blood utilizing DP348 kit (Tiangen,  
9 China). Polymerase chain reaction (PCR) was performed to amplify 2 fragments  
10 encompassing the entire ADRB1 gene. The PCR fragments were then purified and  
11 subjected to cycle sequencing by overlapping primers and the ABI PRISM BigDye  
12 Terminator Ready Reaction Mix (Applied Biosystems, USA). Geno-typing for Codon  
13 49 and Codon 389 of ADRB1 were performed with achieved DNA by TaqMan Assay  
14 (Thermo Fisher, USA). For Codon 49 polymorphism of ADRB1, the corresponding  
15 base of Ser49Ser was AA, Ser49Gly was AG and Gly49Gly was GG; and the forward  
16 primer used was 5'-CCGGGCTTCTGGGGTGTTC-3' and the reverse primer was  
17 5'-GGCGAGGTGATGGCGAGGTAGC-3'. For the polymorphism of Codon 389, the  
18 corresponding base of Arg389Arg was CC, Arg389Gly was CG and Gly389Gly was  
19 GG; and the forward primer was 5'-CGCTCTGCTGGCTGCCCTTCTTC-3' and the  
20 reverse primer was 5'-TGGGCTTCGAGTTCACCTGCTATC-3'.

## 21 **2.3. Clinical data collection**

22 Patients continued pharmacotherapy in outpatient clinic, and the average follow-up  
23 period was 1 year. All  $\beta$ -receptor blocker used in this study was metoprolol tablets or  
24 metoprolol sustained-release tablets. Aldosterone antagonist used was spiro lactone.  
25 The use of ACEI or ARB was decided individually by physicians according to  
26 patients' condition. Patients' baseline data, including age, gender, CHF etiology,  
27 hypertension, diabetes, smoking habit, creatinine level, BNP, heart rate, and NYHA  
28 Classification were all obtained through electronic medical record. Major adverse  
29 cardiac events (MACE) were defined as cardiac death, heart transplantation,

1 malignant arrhythmia, rehospitalization due to CHF. 3-month, 6-month and 1-year  
2 follow-up were completed through outpatient clinic, returning visit or telephone  
3 follow-up.

#### 4 **2.4. Statistical analysis**

5 All statistical analyses were performed with SPSS statistical software (version 20.0,  
6 Chicago, USA). Quantitative data were expressed as mean  $\pm$  SD. One-way ANOVA  
7 was performed to compare among three groups; independent sample *t*-test was  
8 performed to compare between two groups; rank-sum test was performed to compare  
9 NYHA Classification. Enumeration data was compared with chi-squared test.

### 10 **3. Results**

#### 11 **3.1. Baseline Clinical Characteristics**

12 We recruited 260 CHF patients, among which 163 patients (including 121 male and  
13 42 female) have completed full medical records and 1-year follow-up. Mean age was  
14  $62.2 \pm 15.4$  years; baseline heart rate was  $78.5 \pm 14.0$  bpm. Among these patients, 125  
15 patients was diagnosed IHD; 79 had a history of hypertension; 42 had diabetes; 63  
16 were smokers. There were no significant differences in gender, CHF etiology, and  
17 medical history across different genotypes.

#### 18 **3.2. Interaction between Codon 49 genotype and treatment**

19 The analysis results of Codon 49 genotype was shown in figure 1A. As shown in  
20 Table 1 and 2, there was no significant difference in baseline characteristics,  
21 echocardiographic data and pharmacotherapy during 1-year follow-up period  
22 ( $P > 0.05$ ). Compared with the G-allele carriers, a homozygote tended to obtain better  
23 systolic function recovery and more left ventricular size reduction according to  
24 echocardiography within 12-months follow-up; however, they were not statistically  
25 different (Figure 2 and Table 3 and 4). 1-year MACE incidence among patients with  
26 AA genotype was 13.7%; whereas, it was 21.4% among G-allele carriers ( $P = 0.208$ ).

#### 27 **3.3. Interaction between Codon 389 genotype and treatment**

28 The analysis results of Codon 389 genotype was shown in figure 1B. There were no  
29 significant difference between different genotypes of Codon 389 in baseline  
30 characteristics, echocardiography and pharmacotherapy ( $P > 0.05$ , Table 5 and 6).

1 During the whole study, patients carrying G homozygous gene tended to have better  
2 EF and left ventricular size improvement compared with C-allele carriers (Figure  
3 3A,3B,3C and Table 7). In further analysis shown in Table 8, Figure 3D,3E and 3F,  
4 patients with GG genotype responded better to pharmacotherapy, especially when  
5 comparing with those with CC genotype, as shown in EF increase ( $P = 0.000$ ), LVDd  
6 reduction ( $P = 0.007$ ) and LVDs reduction ( $P = 0.001$ ), at 12-month time point.  
7 Towards the end of the study, similar favorable responses among CG genotype were  
8 observed comparing with CC genotype, as shown in EF increase ( $P = 0.019$ ) and  
9 LVDs reduction ( $P = 0.020$ ).

10 As shown in Table 9, participants carrying GG genotype have the lowest MACE  
11 incidence ( $P < 0.05$ ) comparing with other genotypes. 1-year MACE incidence among  
12 G allele carriers was 9.7%, significantly lower than that among CC genotype ( $P =$   
13 0.006).

#### 14 **4. Discussion**

15 Sympathetic-adrenergic system activation is one of the most important compensatory  
16 mechanism of CHF which can ameliorative hemodynamic instability, by increasing  
17 myocardial contractility and decreasing left ventricular diastolic pressure in the  
18 early-phase(1). However, the long-lasting hyperactivation of sympathetic-adrenergic  
19 system would induce cardiomyocytes apoptosis, accelerate cardiac remodeling, and  
20 down-regulate  $\beta$ -receptor density(1). Substantial researches have demonstrated that  $\beta$   
21 blockers can reduce cardiovascular mortality, incidence of sudden cardiac death and  
22 rehospitalization; therefore, the use of  $\beta$  blockers have been recommended as the  
23 standard therapeutic medication in all CHF patients by most guidelines(7).

24 Previous researches demonstrated that gene polymorphisms involved in  
25 catecholamine signaling might modulate CHF progression and patients' response to  
26 therapy(2); however, the results are often controversial. So there are no definite  
27 conclusions to guide clinic applications yet; also, most of these studies were  
28 completed among Caucasians or Americans, but rarely Asians(6).

29 The two primary SNPs of ADRB1 gene are Ser49Gly and Arg389Gly gene  
30 polymers. SNP of Arg389Gly in ADRB1 is in intracellular C-terminus, which is an

1 important site for G-protein binding. Arg389, which occurs in 20% - 30% of Asians,  
2 has higher basal and isoprenaline-stimulated adenylate cyclase activity, decreased  
3 G-protein coupling and reduced  $\beta$  blocker responses. The impact of Arg389Gly on  $\beta$   
4 blocker responses and CHF prognosis were inconsistent in clinical trials.  
5 Improvement of cardiac function(4), reduced mortality(5) and higher exercise  
6 capacity(8) were observed among CHF patients with Arg389 genotype. However,  
7 patients with Gly389X genotype showed greater response to bisoprolol than the  
8 Arg389Arg genotype in ABBA study(9), but no response to  $\beta$  blocker treatment in  
9 subgroup analysis of MERIT-HF study(10).

10 Two fundamental researches observed the different influence of Arg389Gly gene  
11 polymorphisms of ADRB1 gene on positive inotropic effect of norepinephrine in  
12 human atrial myocardium as well: Sandilands et al.(11) found that patients with  
13 Arg389 genotype had stronger inotropic effect and cyclicadenosine monophosphate  
14 (cAMP) reaction to norepinephrine than other genotypes; while Molenaar et al.(12)  
15 did not find such inotropic effects among patients with Arg389 genotype.

16 In our study, the increase of LVEF, the decrease of left ventricular end-diastolic  
17 dimension (LVDD) and left ventricular end-systolic dimension (LVDs) of patients  
18 with GG allele was obviously higher than those with CC allele. At 1-year follow-up,  
19 the MACE incidence of patients with G allele was obviously lower. From all the  
20 above results, we concluded that patients carrying Gly389 gene are more likely to  
21 gain more pronounced therapeutic effects of  $\beta$  blocker, better improvement of cardiac  
22 function and more promising prognosis. Similarly, another Korean study published in  
23 2016 found that Gly389 carriers were more sensitive to bisoprolol and had better  
24 prognosis comparing with patients with Arg389Arg(9). Biolo A et al. found that  
25 Gly389 carriers had better prognosis and higher survival rate in 2008(13) and  
26 2010(14). Also, HF-ACTION DNA substudy showed that patients with Arg389Arg  
27 allele need higher dosage of  $\beta$  blocker than other genotypes in CHF patients(15).  
28 These results are all in accordance with our results.

29 The functional consequences of Gly49 genotype, which occurs in the N-terminus  
30 region of 14% Asian people, are involved in receptor down-regulation as well as in

1 intracellular trafficking(16). In 2002, Rathz et al.(17) found the affinity to agonist and  
2 antagonist of both gene variants were similar; however, Gly49 presented with a more  
3 significant receptor down-regulation with long-termagonist treatment compared with  
4 Ser49. Also in 2002, Levin MC et al found the adenylate cyclase activity of patients  
5 with Gly49 genotype was higher than those with Ser49 while it was more sensitive to  
6 inhibitor such as metoprolol(3). The more common Ser49Ser genotype responded less  
7 beneficially to  $\beta$  blockers, and this would motivate genotyping to guide doctors to  
8 give higher doses for a better clinical outcome(18).

9 Our study found that there was no statistic difference in cardiac function changes  
10 and MACE incidence between different genotypes of Codon 49. It implied that  
11 Ser49Gly polymorphism had no obvious influence on therapeutic effects and  
12 patients' prognosis, which is in consistence with the conclusion of Humma's  
13 research(19).

14 This is a retrospective study, so we can not titrage the dosage of  $\beta$  blocker.  
15 However, in our study, there is no difference of the dosage of  $\beta$  blocker in patients  
16 with different genotypes at 1 year, while the therapeutic effects were obviously worse  
17 among patients with CC than those with GG allele, also slightly worse that those with  
18 CG allele. We inferred that, if possible, in order to achieve the best therapeutic effect,  
19 larger dose of  $\beta$  blocker is required among patients with CC genotype.

20 Considering CRT-P and CRT-D have some effects on cardiac function of CHF  
21 patients, and the treatment of valvular heart disease is mainly depend on surgery  
22 instead of drug therapy, our study exclude the above-mentioned cases.

## 23 **5. Conclusions**

24 Our study concluded that Arg389Gly  $\beta$ 1-adrenergic receptor polymorphism is related  
25 to  $\beta$  blockers' therapeutic effect and prognosis of CHF, but not Ser49Gly. With the  
26 same dosage of CHF drugs, the improvement of cardiac function and prognosis of  
27 patients with Gly389 allele is obviously better than those carrying CC homozygote.  
28 This provided a possible gene-related individualized therapeutic plan among CHF  
29 patients.

30



1 **Conflicts of interest**

2 The authors declare that there are no conflicts of interest.

3

4 **Acknowledgements**

5 This work was supported by the National Natural Science Foundation of China  
6 (grant number 81200092); foundation of the health department of Jiangsu Province  
7 (grant number z201514); Nanjing Medical Science and Technique Development  
8 Foundation ( grant number ZKX13023).

9

10 **References**

- 11 (1) Lymperopoulos A, Rengo G, and Koch WJ. Adrenergic nervous system in heart  
12 failure: pathophysiology and therapy. *Circ Res* 2013; **113**: 739-53.
- 13 (2) Shin J, and Johnson JA. Beta-blocker pharmacogenetics in heart failure. *Heart*  
14 *Fail Rev* 2010; **15**: 187-96.
- 15 (3) Levin MC, Marullo S, Muntaner O, *et al.* The myocardium-protective Gly-49  
16 variant of the beta 1-adrenergic receptor exhibits constitutive activity and  
17 increased desensitization and down-regulation. *J Biol Chem* 2002; **277**:  
18 30429-35.
- 19 (4) Mialet Perez J, Rathz DA, Petrashevskaya NN, *et al.* Beta 1-adrenergic  
20 receptor polymorphisms confer differential function and predisposition to  
21 heart failure. *Nat Med* 2003; **9**: 1300-5.
- 22 (5) Liggett SB, Mialet-Perez J, Thaneemit-Chen S, *et al.* A polymorphism within a  
23 conserved beta(1)-adrenergic receptor motif alters cardiac function and  
24 beta-blocker response in human heart failure. *Proc Natl Acad Sci U S A* 2006;  
25 **103**: 11288-93.
- 26 (6) Muthumala A, Drenos F, Elliott PM, *et al.* Role of beta adrenergic receptor  
27 polymorphisms in heart failure: systematic review and meta-analysis. *Eur J*  
28 *Heart Fail* 2008; **10**: 3-13.
- 29 (7) Fleg JL, Pina IL, Balady GJ, *et al.* Assessment of functional capacity in clinical  
30 and research applications: an advisory from the committee on exercise,

- 1 rehabilitation, and prevention, council on clinical cardiology, American Heart  
2 Association. *Circulation* 2000; **102**: 1591-7.
- 3 (8) Wagoner LE, Craft LL, Zengel P, *et al.* Polymorphisms of the beta1-adrenergic  
4 receptor predict exercise capacity in heart failure. *Am Heart J* 2002; **144**: 840-6.
- 5 (9) Lee HY, Chung WJ, Jeon HK, *et al.* Impact of the beta-1 adrenergic receptor  
6 polymorphism on tolerability and efficacy of bisoprolol therapy in Korean  
7 heart failure patients: association between beta adrenergic receptor  
8 polymorphism and bisoprolol therapy in heart failure (Abba) Study. *Korean J*  
9 *Intern Med* 2016; **31**: 277-87.
- 10 (10) White HL, de Boer RA, Maqbool A, *et al.* An evaluation of the beta-1  
11 adrenergic receptor Arg389gly polymorphism in Individuals with heart failure:  
12 a Merit-Hf sub-study. *Eur J Heart Fail* 2003; **5**: 463-8.
- 13 (11) Sandilands AJ, O'Shaughnessy KM, and Brown MJ. Greater inotropic and  
14 cyclic amp responses evoked by noradrenaline through Arg389 beta  
15 1-adrenoceptors versus Gly389 beta 1-adrenoceptors in isolated human atrial  
16 myocardium. *Br J Pharmacol* 2003; **138**: 386-92.
- 17 (12) Molenaar P, Rabnott G, Yang I, *et al.* Conservation of the cardiostimulant  
18 effects of (-)-norepinephrine across Ser49gly and Gly389arg  
19 beta(1)-adrenergic receptor polymorphisms in human right atrium in vitro. *J*  
20 *Am Coll Cardiol* 2002; **40**: 1275-82.
- 21 (13) Biolo A, Clausell N, Santos KG, *et al.* Impact of Beta1-adrenergic receptor  
22 polymorphisms on susceptibility to heart failure, arrhythmogenesis, prognosis,  
23 and response to beta-blocker therapy. *Am J Cardiol* 2008; **102**: 726-32.
- 24 (14) Biolo A, Salvaro R, Clausell N, *et al.* Impact of beta-2 Thr164ile and combined  
25 beta-adrenergic receptor polymorphisms on prognosis in a cohort of heart  
26 failure outpatients. *Braz J Med Biol Res* 2010; **43**: 565-71.
- 27 (15) Fiuzat M, Neely ML, Starr AZ, *et al.* Association between adrenergic receptor  
28 genotypes and beta-blocker dose in heart failure patients: analysis from the  
29 hf-action DNA substudy. *Eur J Heart Fail* 2013; **15**: 258-66.
- 30 (16) von Homeyer P and Schwinn DA. Pharmacogenomics of beta-adrenergic

- 1           receptor physiology and response to beta-blockade.*Anesth Analg*2011; **113**:  
2           1305-18.
- 3   (17)   Rathz DA, Brown KM, Kramer LA,*et al.* Amino acid 49 polymorphisms of  
4           the human beta1-adrenergic receptor affect agonist-promoted trafficking.*J*  
5           *Cardiovasc Pharmacol*2002; **39**: 155-60.
- 6   (18)   Magnusson Y, Levin MC, Eggertsen R,*et al.* Ser49gly of beta1-adrenergic  
7           receptor Is associated with effective beta-blocker dose in dilated  
8           cardiomyopathy.*Clin Pharmacol Ther*2005; **78**: 221-31.
- 9   (19)   Humma LM, Puckett BJ, Richardson HE,*et al.* Effects of beta1-adrenoceptor  
10          genetic polymorphisms on resting hemodynamics in patients undergoing  
11          diagnostic testing for ischemia.*Am J Cardiol* 2001;**88**: 1034-7.

12  
13  
14  
15  
16  
17  
18  
19  
20  
21  
22  
23  
24  
25  
26  
27  
28  
29  
30

1 **Figure legends**

2 **Figure 1.** Taqman analysis of  $\beta$ 1-adrenoreceptor gene polymorphism.

3 A: Taqman analysis of Codon 49; B: Taqman analysis of Codon 389.

4 **Figure 2.** Interaction between Codon 49 genotype of  $\beta$ 1-adrenoceptor gene and  
5 echocardiographic data.

6 EF, ejection fraction; LVDd, left ventricular end-diastolic dimension; LVDs, left  
7 ventricular end-systolic dimension.

8 **Figure 3.** Interaction between Codon 389 genotype of  $\beta$ 1-adrenoceptor gene and  
9 echocardiographic data.

10 EF, ejection fraction; LVDd, left ventricular end-diastolic dimension; LVDs, left  
11 ventricular end-systolic dimension.

12

13

14

15

16

17

18

19

20

21

22

23

24

25

26

27

28

29

30

1

**Table 1. Baseline characteristics**

|                            | Codon 49      |                | <i>P</i> value |
|----------------------------|---------------|----------------|----------------|
|                            | AA (n = 128)  | AG/GG (n = 35) |                |
| Age (years)                | 62.8 ± 15.5   | 60.2 ± 14.8    | 0.384          |
| Male (%)                   | 73.4          | 77.1           | 0.828          |
| Etiology (IDCM,%)          | 78.9          | 68.6           | 0.258          |
| Hypertension (%)           | 49.2          | 45.7           | 0.699          |
| Diabetes (%)               | 27.3          | 20.0           | 0.369          |
| Smoke (%)                  | 39.1          | 37.1           | 0.843          |
| Creatinine (µmol/L)        | 95.1 ± 42.1   | 90.5 ± 30.6    | 0.584          |
| BNP (pg/mL)                | 972.9 ± 984.7 | 769.4 ± 634.9  | 0.357          |
| Heart rate (bpm )          | 78.3 ± 14.9   | 79.2 ± 15.2    | 0.784          |
| NYHA Classification        |               |                |                |
| ClassII                    | 31 (24.2%)    | 11 (31.4%)     | 0.218          |
| ClassIII                   | 47 (36.7%)    | 14 (40.0%)     |                |
| Echocardiography           |               |                |                |
| EF (%)                     | 31.2 ± 5.9    | 31.4 ± 7.0     | 0.831          |
| LVDd (mm)                  | 67.8 ± 8.9    | 67.7 ± 8.4     | 0.952          |
| LVDs (mm)                  | 57.6 ± 9.3    | 57.8 ± 9.2     | 0.891          |
| IVSTd (mm)                 | 8.5 ± 1.5     | 8.4 ± 1.4      | 0.714          |
| LVPWTd (mm)                | 8.6 ± 1.3     | 8.6 ± 1.2      | 0.735          |
| LAD (mm)                   | 50.5 ± 8.4    | 50.3 ± 8.0     | 0.920          |
| Pharmacotherapy            |               |                |                |
| ACEI/ARB (%)               | 88.3          | 82.9           | 0.385          |
| β-receptor blocker (%)     | 92.2          | 88.6           | 0.452          |
| Metoprolol (mg)            | 45.9 ± 34.7   | 52.8 ± 34.8    | 0.340          |
| Aldosterone antagonist (%) | 93.8          | 91.4           | 0.764          |
| Spirolactone (mg)          | 20.1 ± 6.5    | 20.0 ± 0.0     | 0.962          |

1 IDCM, idiopathic dilated cardiomyopathy; BNP, brain natriuretic peptide; NYHA,  
 2 New York Heart Association; EF, ejection fraction; LVDd,  
 3 left ventricular end-diastolic dimension; LVDs, left ventricular end-systolic dimension;  
 4 IVSTd, interventricular septum thickness at end-diastole; LVPWTd, left ventricular  
 5 posterior wall thickness at end-diastole; LAD, left atrial diameter; ACEI,  
 6 angiotensin-converting enzyme inhibitors; ARB, angiotensin receptor blocker.

7

8 **Table 2. Pharmacotherapy within 1-year follow-up**

|                            | Ser49Gly     |                | <i>P</i> value |
|----------------------------|--------------|----------------|----------------|
|                            | AA (n = 128) | AG/GG (n = 35) |                |
| 3months                    |              |                |                |
| ACEI/ARB (%)               | 92.2%        | 91.4%          | 0.589          |
| β-receptor blocker (%)     | 95.3%        | 94.3%          | 0.871          |
| Metoprolol (mg)            | 50.6 ± 40.7  | 54.2 ± 37.7    | 0.417          |
| Aldosterone antagonist (%) | 94.5%        | 91.4%          | 0.436          |
| 6months                    |              |                |                |
| Spirolactone (mg)          | 20.2 ± 4.3   | 20.0 ± 0.0     | 0.536          |
| 12months                   |              |                |                |
| ACEI/ARB (%)               | 96.1%        | 97.1%          | 0.629          |
| β-receptor blocker (%)     | 97.7%        | 97.1%          | 0.634          |

|                            |             |             |       |
|----------------------------|-------------|-------------|-------|
| Metoprolol (mg)            | 49.8 ± 41.1 | 52.1 ± 40.2 | 0.510 |
| Aldosterone antagonist (%) | 96.1%       | 94.3%       | 0.398 |
| Spirolactone (mg)          | 20.6 ± 2.8  | 20.1 ± 1.8  | 0.878 |

1 ACEI, angiotensin-converting enzyme inhibitors; ARB, angiotensin receptor blocker.

2

3 **Table 3. Echocardiography within 1-year follow-up**

|           | Time     | Ser49Gly     |                |
|-----------|----------|--------------|----------------|
|           |          | AA (n = 128) | AG/GG (n = 35) |
| EF (%)    | 3months  | 32.9 ± 7.0   | 31.5 ± 6.7     |
|           | 6months  | 34.1 ± 8.1   | 31.8 ± 6.9     |
|           | 12months | 35.3 ± 9.9   | 32.3 ± 7.4     |
| LVDd (mm) | 3months  | 67.1 ± 8.9   | 67.7 ± 8.0     |
|           | 6months  | 66.5 ± 9.2   | 67.6 ± 8.1     |
|           | 12months | 65.8 ± 9.9   | 67.3 ± 8.4     |
| LVDs (mm) | 3months  | 56.4 ± 9.6   | 57.7 ± 9.1     |
|           | 6months  | 55.6 ± 10.2  | 57.4 ± 9.0     |
|           | 12months | 54.8 ± 11.1  | 56.9 ± 9.4     |

4 EF, ejection fraction; LVDd, left ventricular end-diastolic dimension; LVDs, left  
5 ventricular end-systolic dimension.

6

7 **Table 4. Echocardiography within 1-year follow-up**

|                 | Time     | Codon 49     |                |         |
|-----------------|----------|--------------|----------------|---------|
|                 |          | AA (n = 128) | AG/GG (n = 35) | P value |
| EF increase (%) | 3months  | 1.8 ± 5.0    | 0.1 ± 1.8      | 0.078   |
|                 | 6months  | 2.9 ± 6.8    | 0.4 ± 2.9      | 0.217   |
|                 | 12months | 4.0 ± 9.1    | 0.9 ± 4.9      | 0.203   |

|                        |          |           |           |       |
|------------------------|----------|-----------|-----------|-------|
| LVDD reduction<br>(mm) | 3months  | 0.6 ± 2.6 | 0.1 ± 1.6 | 0.229 |
|                        | 6months  | 1.2 ± 4.3 | 0.2 ± 2.2 | 0.602 |
|                        | 12months | 2.0 ± 6.1 | 0.4 ± 3.1 | 0.461 |
| LVDs reduction<br>(mm) | 3months  | 1.1 ± 3.7 | 0.1 ± 1.3 | 0.178 |
|                        | 6months  | 2.0 ± 5.4 | 0.4 ± 2.3 | 0.430 |
|                        | 12months | 2.8 ± 7.3 | 1.0 ± 3.9 | 0.394 |

1 EF, ejection fraction; LVDD, left ventricular end-diastolic dimension; LVDs, left  
2 ventricular end-systolic dimension.

3

4 **Table 5. Baseline characteristics**

|                     | Codon 389      |               |               | <i>P</i> value |
|---------------------|----------------|---------------|---------------|----------------|
|                     | CC (n = 79)    | CG (n = 69)   | GG (n = 15)   |                |
| Age (years)         | 64.2 ± 15.1    | 61.1 ± 16.0   | 56.7 ± 12.3   | 0.157          |
| Male (%)            | 65.8%          | 82.6%         | 80%           | 0.463          |
| Etiology (IDCM ,%)  | 77.2%          | 76.8%         | 73.3%         | 0.948          |
| Hypertension (%)    | 53.2%          | 43.5%         | 46.7%         | 0.515          |
| Diabetes (%)        | 30.4%          | 21.7%         | 20%           | 0.233          |
| Smoke (%)           | 46.8%          | 29%           | 40%           | 0.069          |
| Creatinine (umol/L) | 98.2 ± 49.2    | 87.6 ± 25.4   | 102.2 ± 34.8  | 0.253          |
| BNP (pg/mL)         | 986.7 ± 1103.1 | 905.8 ± 768.9 | 799.6 ± 711.2 | 0.814          |
| Heart rate (bpm )   | 78.6 ± 15.9    | 79.1 ± 13.7   | 74.9 ± 15.2   | 0.653          |
| NYHA Classification |                |               |               | 0.096          |
| Stage II            | 17 (21.5%)     | 18 (26.1%)    | 6 (40.0%)     |                |
| Stage III           | 32 (40.5%)     | 22 (31.9%)    | 7 (46.6%)     |                |
| Echocardiography    |                |               |               |                |
| EF (%)              | 31.7 ± 6.2     | 31.5 ± 5.8    | 27.6 ± 6.4    | 0.051          |
| LVDD (mm)           | 68.2 ± 8.4     | 66.8 ± 9.3    | 70.0 ± 7.8    | 0.358          |



|                        |             |             |             |       |
|------------------------|-------------|-------------|-------------|-------|
| LVDs (mm)              | 58.1 ± 8.8  | 56.4 ± 9.8  | 60.9 ± 8.6  | 0.206 |
| IVSTd (mm)             | 8.6 ± 1.6   | 8.4 ± 1.3   | 8.3 ± 1.5   | 0.432 |
| LVPWTd (mm)            | 8.8 ± 1.4   | 8.4 ± 1.0   | 8.3 ± 1.1   | 0.101 |
| LAD (mm)               | 51.0 ± 8.9  | 49.7 ± 7.9  | 50.4 ± 6.5  | 0.644 |
| Pharmacotherapy        |             |             |             |       |
| ACEI/ARB (%)           | 87.3%       | 87%         | 86.7%       | 0.895 |
| β-receptor blocker (%) | 92.4%       | 91.3%       | 86.7%       | 0.689 |
| Metoprolol (mg)        | 44.7 ± 32.0 | 48.2 ± 34.9 | 57.5 ± 47.0 | 0.467 |
| Spirolactone (%)       | 93.7%       | 94.2%       | 86.7%       | 0.663 |
| Spirolactone (mg)      | 20.3 ± 2.5  | 21.5 ± 8.6  | 20.0 ± 0.0  | 0.479 |

1 IDCM, idiopathic dilated cardiomyopathy; BNP, brain natriuretic peptide; NYHA,  
 2 New York Heart Association; EF, ejection fraction; LVDd,  
 3 left ventricular end-diastolic dimension; LVDs, left ventricular end-systolic dimension;  
 4 IVSTd, interventricular septum thickness at end-diastole; LVPWTd, left ventricular  
 5 posterior wall thickness at end-diastole; LAD, left atrial diameter; ACEI,  
 6 angiotensin-converting enzyme inhibitors; ARB, angiotensin receptor blocker.

7

8 **Table 6. Pharmacotherapy within 1-year follow-up**

|                        | Codon 389   |             |             | Pvalue |
|------------------------|-------------|-------------|-------------|--------|
|                        | CC (n = 79) | CG (n = 69) | GG (n = 15) |        |
| 3months                |             |             |             |        |
| ACEI/ARB (%)           | 92.4%       | 92.8%       | 93.3%       | 0.647  |
| β-receptor blocker (%) | 95.0%       | 92.8%       | 93.3%       | 0.712  |
| Metoprolol (mg)        | 49.3 ± 34.2 | 51.6 ± 36.6 | 58.2 ± 45.8 | 0.367  |
| Spirolactone (%)       | 93.7%       | 94.2%       | 93.3%       | 0.634  |
| Spirolactone (mg)      | 20.7 ± 3.0  | 20.8 ± 5.3  | 20.0 ± 0.0  | 0.887  |
| 6months                |             |             |             |        |

|                               |                 |                 |                 |       |
|-------------------------------|-----------------|-----------------|-----------------|-------|
| ACEI/ARB (%)                  | 95.0%           | 94.2%           | 93.3%           | 0.299 |
| $\beta$ -receptor blocker (%) | 97.5%           | 97.1%           | 100.0%          | 0.310 |
| Metoprolol (mg)               | 51.2 $\pm$ 36.0 | 50.3 $\pm$ 37.4 | 56.5 $\pm$ 44.2 | 0.276 |
| Spirolactone(%)               | 96.2%           | 95.7%           | 93.3%           | 0.421 |
| Spirolactone(mg)              | 20.5 $\pm$ 1.9  | 20.7 $\pm$ 4.8  | 20.0 $\pm$ 0.0  | 0.871 |
| 12months                      |                 |                 |                 |       |
| ACEI/ARB (%)                  | 96.2%           | 97.1%           | 93.3%           | 0.429 |
| $\beta$ -receptor blocker (%) | 97.5%           | 97.1%           | 100.0%          | 0.587 |
| Metoprolol (mg)               | 50.7 $\pm$ 35.8 | 51.6 $\pm$ 38.1 | 56.3 $\pm$ 42.1 | 0.301 |
| Spirolactone(%)               | 95.0%           | 95.7%           | 93.3%           | 0.410 |
| Spirolactone (mg)             | 20.6 $\pm$ 2.8  | 20.2 $\pm$ 1.7  | 20.0 $\pm$ 0.0  | 0.892 |

1 ACEI, angiotensin-converting enzyme inhibitors; ARB, angiotensin receptor blocker.

2

3

**Table 7. Echocardiography within 1-year follow-up**

|           | Months | Codon 389      |                 |                 |
|-----------|--------|----------------|-----------------|-----------------|
|           |        | CC (n = 79)    | CG (n = 69)     | GG (n = 15)     |
| EF (%)    | 3      | 32.3 $\pm$ 6.5 | 32.9 $\pm$ 6.4  | 33.2 $\pm$ 11.3 |
|           | 6      | 32.6 $\pm$ 7.0 | 34.2 $\pm$ 7.6  | 36.3 $\pm$ 11.9 |
|           | 12     | 33.0 $\pm$ 8.3 | 35.5 $\pm$ 9.5  | 39.3 $\pm$ 13.6 |
| LVDD (mm) | 3      | 67.9 $\pm$ 8.2 | 66.3 $\pm$ 9.1  | 67.6 $\pm$ 9.5  |
|           | 6      | 67.8 $\pm$ 8.4 | 65.8 $\pm$ 9.5  | 65.5 $\pm$ 9.2  |
|           | 12     | 67.6 $\pm$ 8.9 | 65.0 $\pm$ 9.9  | 63.0 $\pm$ 10.6 |
| LVDs (mm) | 3      | 57.4 $\pm$ 8.9 | 55.6 $\pm$ 9.8  | 57.0 $\pm$ 11.3 |
|           | 6      | 57.3 $\pm$ 9.2 | 54.9 $\pm$ 10.3 | 54.3 $\pm$ 12.0 |
|           | 12     | 57.0 $\pm$ 9.9 | 54.1 $\pm$ 10.9 | 51.3 $\pm$ 13.4 |

4 ACEI, angiotensin-converting enzyme inhibitors; ARB, angiotensin receptor blocker.

5

6

**Table 8. Echocardiography within 1-year follow-up**

| Months | Codon 389 | <i>P</i> value |
|--------|-----------|----------------|
|--------|-----------|----------------|

|                     |    | CC (n =<br>79) | CG (n =<br>69) | GG (n = 15) |       |
|---------------------|----|----------------|----------------|-------------|-------|
| EF increase (%)     | 3  | 0.6± 2.9       | 1.5± 4.1       | 5.6± 9.5    | 0.005 |
|                     | 6  | 0.9± 4.5       | 2.7± 6.3       | 8.7± 9.8    | 0.000 |
|                     | 12 | 1.3± 6.7       | 4.0± 8.5       | 11.7± 11.5  | 0.000 |
| LVDD reduction (mm) | 3  | 0.1± 2.2       | 0.5± 1.9       | 2.5± 4.3    | 0.104 |
|                     | 6  | 0.3± 3.6       | 1.1± 3.5       | 4.6± 5.7    | 0.010 |
|                     | 12 | 0.6± 4.5       | 1.7± 5.3       | 7.1± 9.0    | 0.007 |
| LVDs reduction (mm) | 3  | 0.4± 2.9       | 0.9± 2.7       | 3.9± 6.3    | 0.026 |
|                     | 6  | 0.6± 4.1       | 1.7± 4.5       | 6.6± 7.5    | 0.002 |
|                     | 12 | 1.0± 5.3       | 2.3± 6.4       | 9.6± 10.0   | 0.001 |

1 EF, ejection fraction; LVDD, left ventricular end-diastolic dimension; LVDs, left  
2 ventricular end-systolic dimension.

3

4

**Table 9. MACE within 1-year follow-up**

| Genotype of Codon 389 | 1-year MACE |          | <i>P</i> value |
|-----------------------|-------------|----------|----------------|
| CC (n = 126)          | 22.2%       | CC vs CG | 0.009          |
| CG (n = 110)          | 10.0%       | CC vs GG | 0.094          |
| GG (n = 24)           | 8.3%        | CG vs GG | 0.803          |
| <i>P</i> value        | 0.021       |          |                |

5

6

7

8

9

10

11

12

13

14

1 **Figure 1**

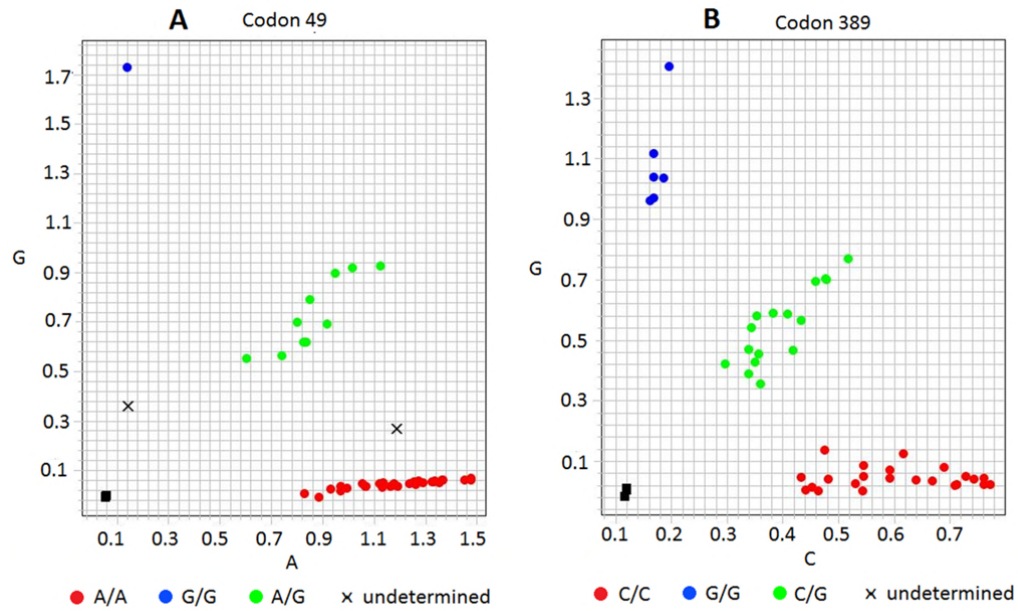

2

3

4

5

6

7

8

9

10

11

12

13

14

15

16

17

18

19

1 **Figure 2**

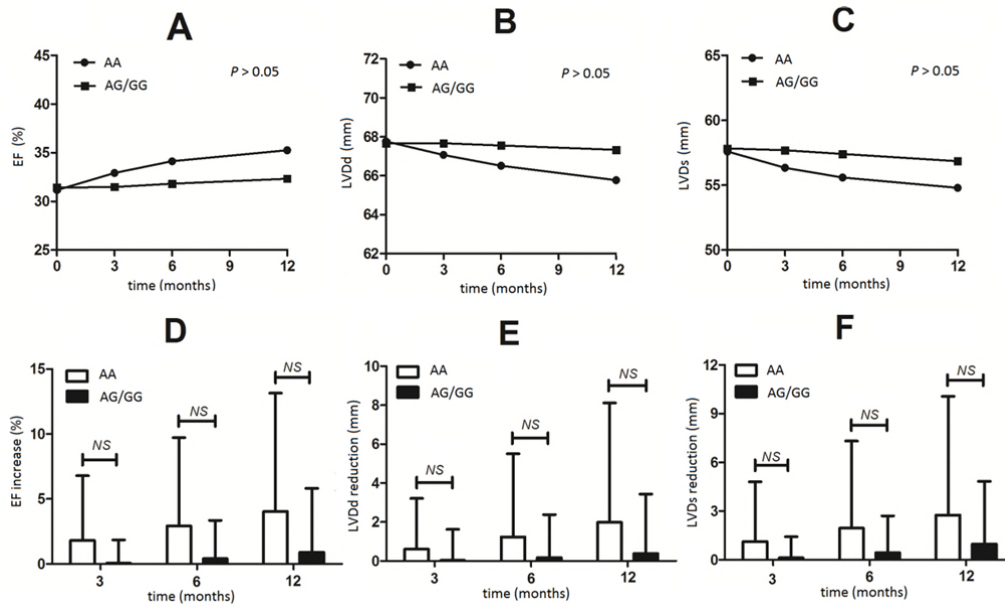

2

3

4

5

6

7

8

9

10

11

12

13

14

15

16

17

18

19

20

1 **Figure 3**

2

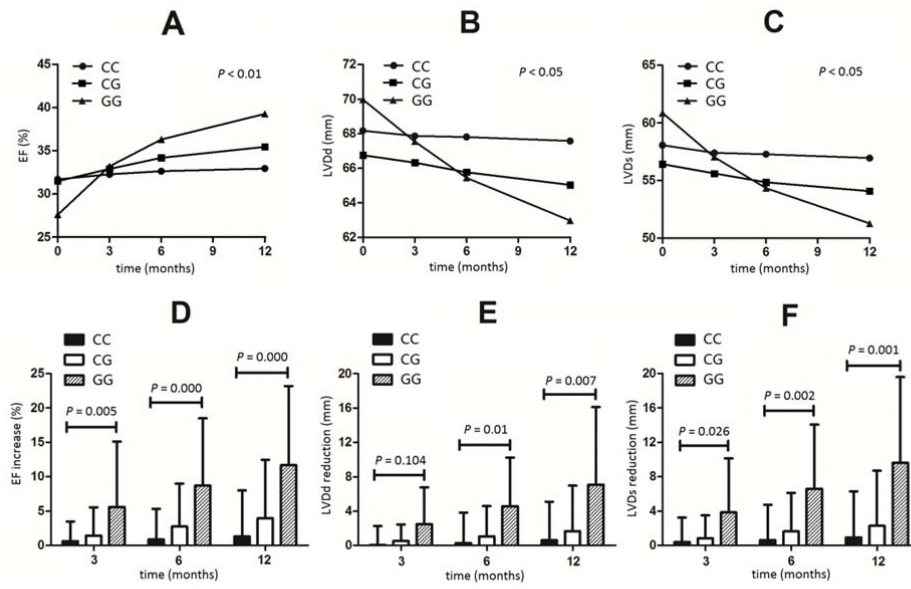

3
